# Supplementary material for: An investigation of the predominant structure of antibiotic azithromycin in chloroform solution through NMR and thermodynamic analysis
Source: Royal Society of Chemistry journal article supplement (doi:10.1039/d2cp02843c), 2022-01-01
Supplement: d2cp02843c1.pdf [file d2cp02843c1.pdf]

**SUPPLEMENTARY MATERIAL (Supporting information)**

***An Investigation of the Predominant Structure of Antibiotic Azithromycin in Chloroform Solution through NMR and Thermodynamic Analysis***

Isabel S. Hernandez<sup>a</sup>, Haroldo C. Da Silva<sup>a</sup>, Hélio F. Dos Santos<sup>b,c</sup>, Eloah P. Ávila<sup>c</sup>, Mauro V. De Almeida<sup>c</sup>,  
Matheus G. R. Gomes<sup>a</sup>, Diego. F. S. Paschoal<sup>d</sup>, Wagner B. De Almeida<sup>a,\*</sup>

<sup>a</sup> Laboratório de Química Computacional e Modelagem Molecular (LQC-MM), Departamento de Química Inorgânica, Instituto de Química, Universidade Federal Fluminense (UFF), Outeiro de São João Batista s/n, Campus do Valonguinho, 24020-141, Centro, Niterói, RJ, Brazil.

<sup>b</sup> Núcleo de Estudos em Química Computacional (NEQC)

<sup>c</sup> Departamento de Química, ICE, Universidade Federal de Juiz de Fora (UFJF), Campus Universitário, Martelos, Juiz de Fora, MG, 36036-330, Brazil.

<sup>d</sup> NQTCM: Núcleo de Química Teórica e Computacional de Macaé, Polo Ajuda, Instituto Multidisciplinar de Química, Centro Multidisciplinar UFRJ-Macaé, Universidade Federal do Rio de Janeiro, Macaé, RJ, 27.971-525, Brazil

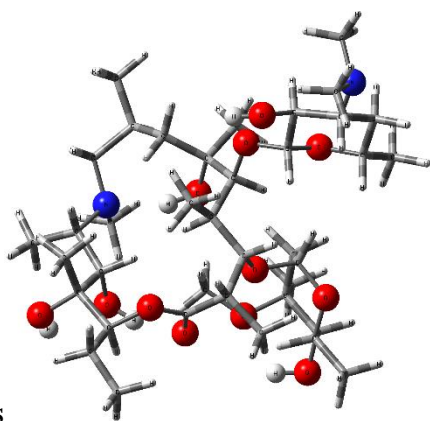

(a) M1-A-C3SC5S

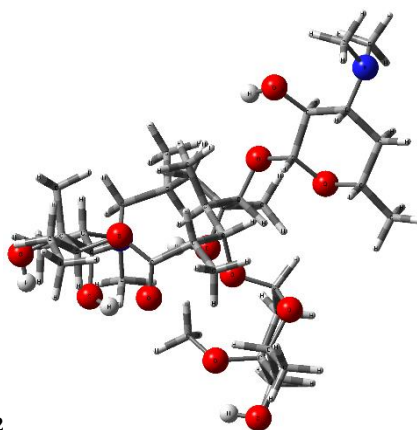

(b) M1-A-C3SC5S-View-2

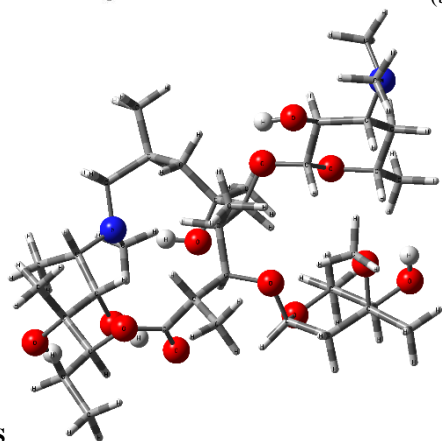

(c) M2-A-C3RC5S

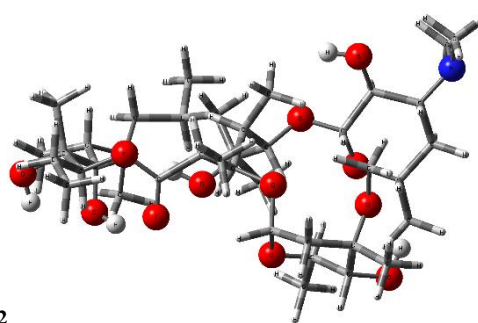

(d) M2-A-C3RC5S-View-2

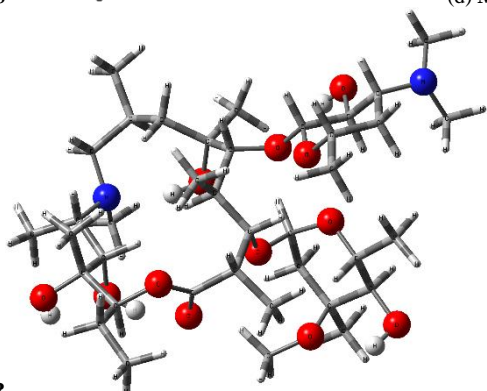

(e) M3-A-C3SC5R

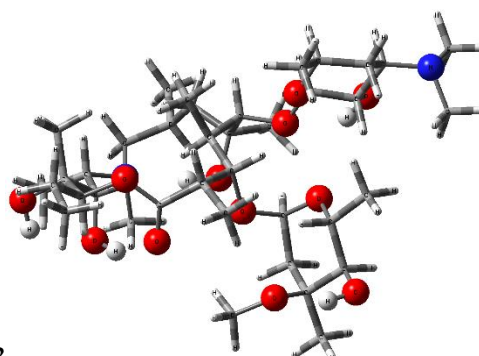

(f) M3-A-C3SC5R-View-2

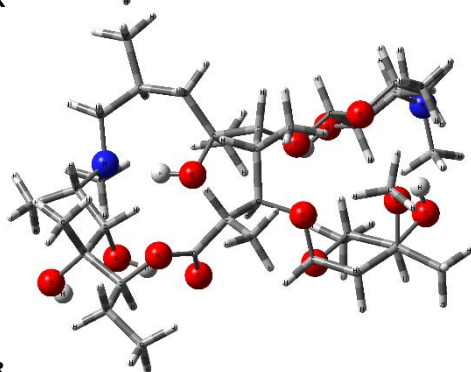

(g) M4-A-C3RC5R

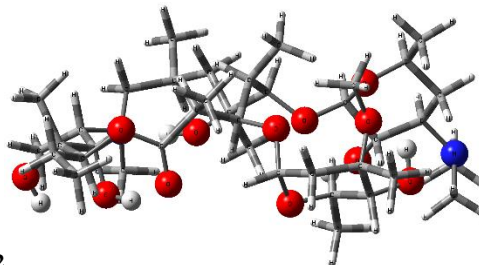

(h) M4-A-C3RC5R-View-2

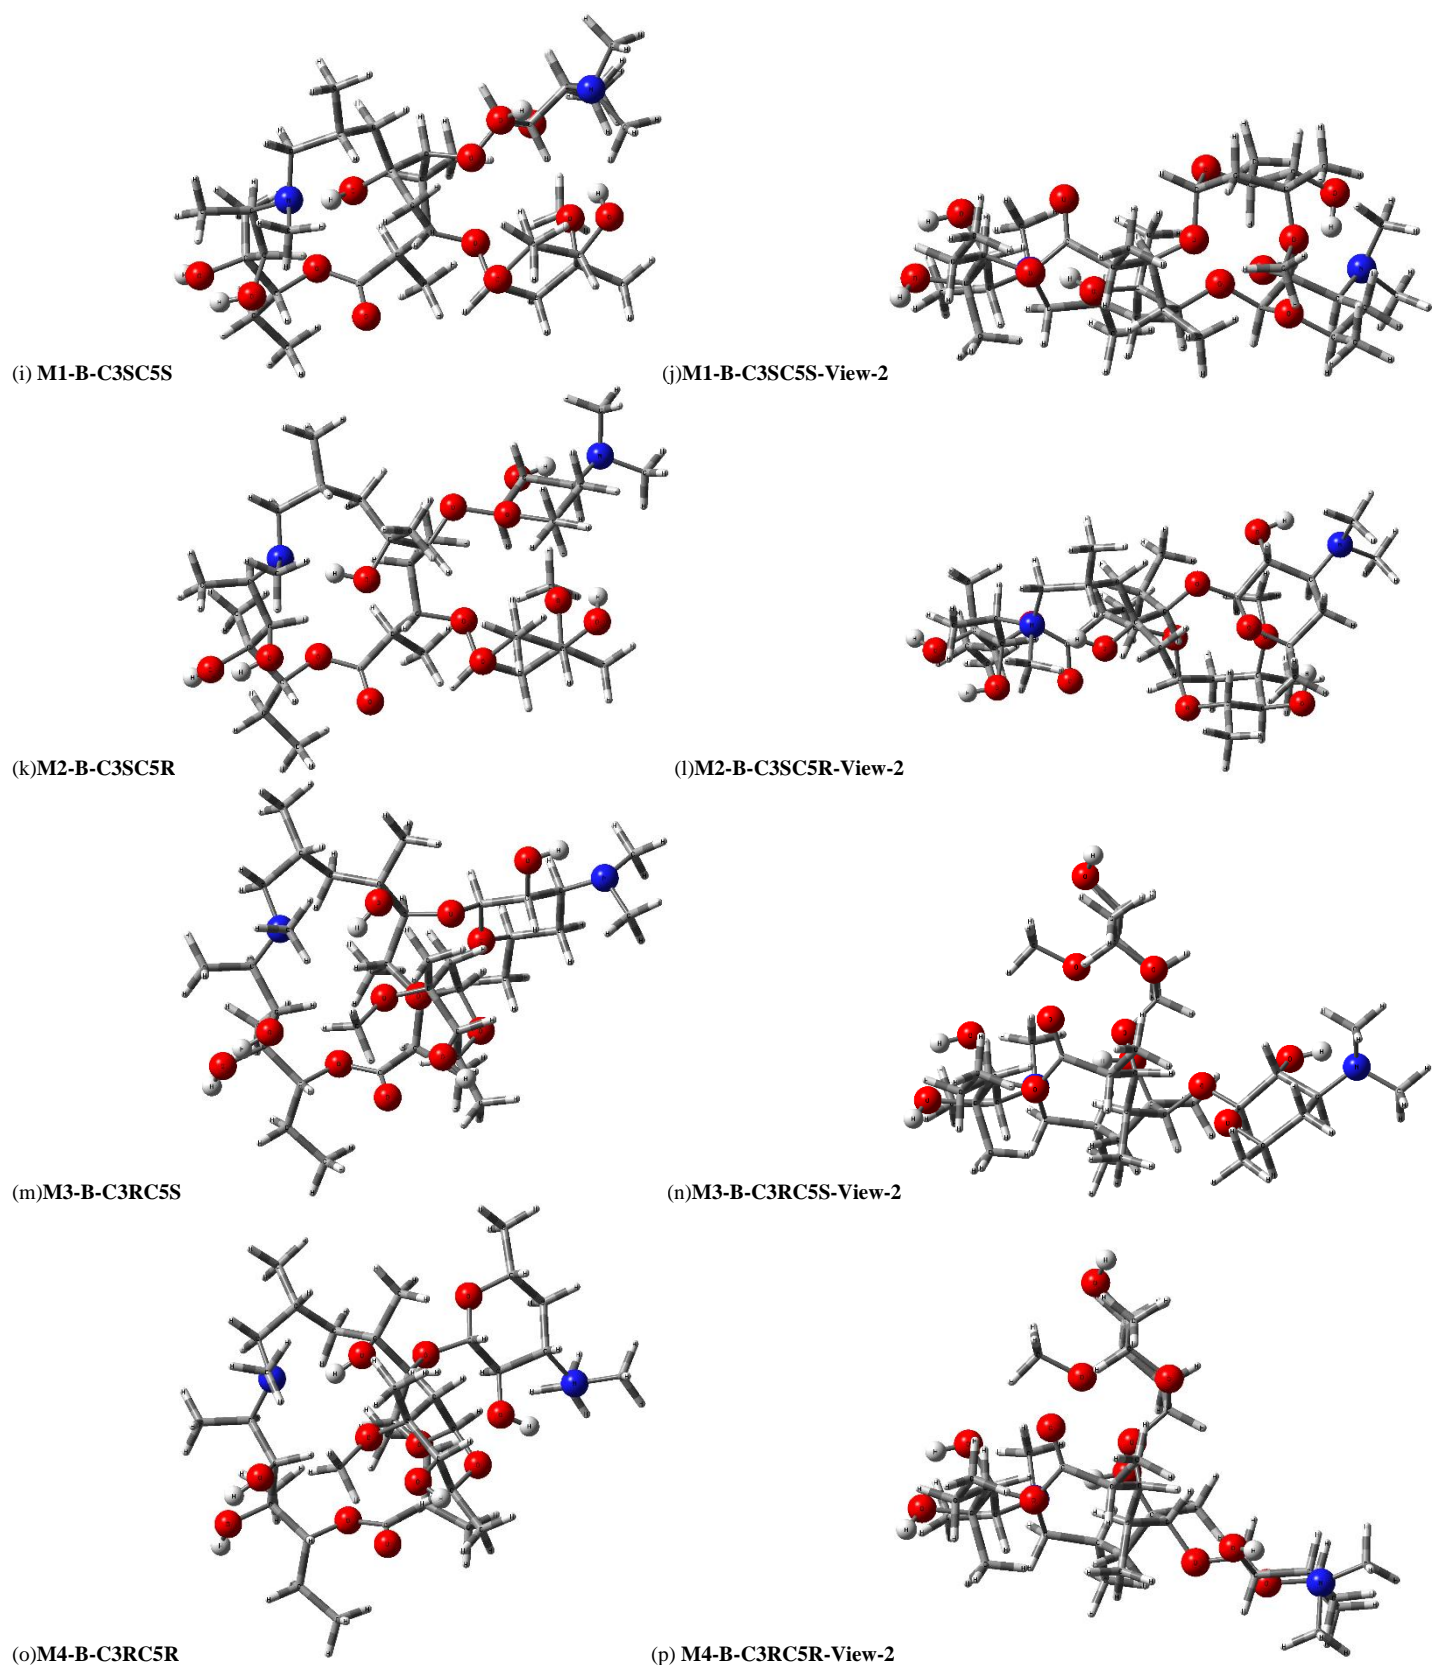

**Figure S1.**  $\omega$ B97x-D/6-31G(d, p) (PCM-Chloroform) fully optimized structures of azithromycin using as starting point X-Ray cartesian coordinates of enantiomers “A” (C3R-C5S) and “B” (C3S-C5R). Heteroatoms and O-H groups are highlighted to ease visualize conformational differences. All four possible configurations for C3 and C5 carbons atoms were explored.

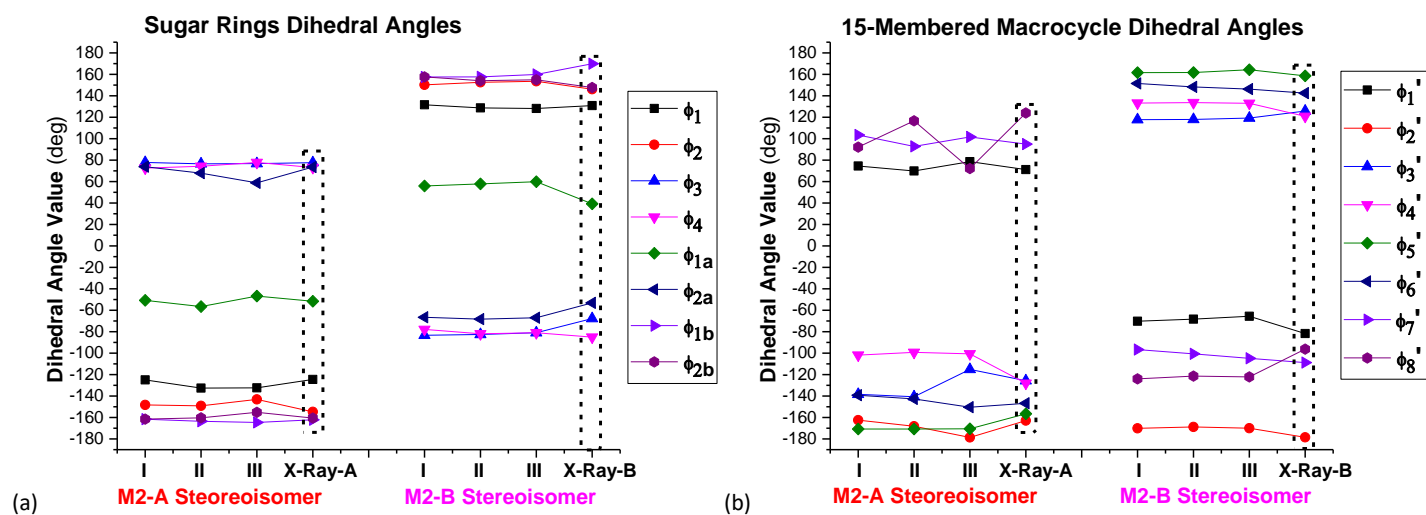

**Figure S2.** X-Ray and DFT ( $\omega$ B97x-D/6-31G(d, p) optimized structures using as input X-Ray cartesian coordinates) torsion angles ( $^{\circ}$ ) for enantiomers “A” and “B” of azithromycin. X-Ray data for stereoisomers “A” and “B” are highlighted in the dashed rectangle.

**2-I:** geometry optimized in the vacuum.

**2-II:** geometry optimized using the PCM model (chloroform solvent) to include solvent effects.

**2-III:** PCM-Chloroform optimization including five explicit  $\text{CHCl}_3$  solvent molecules.

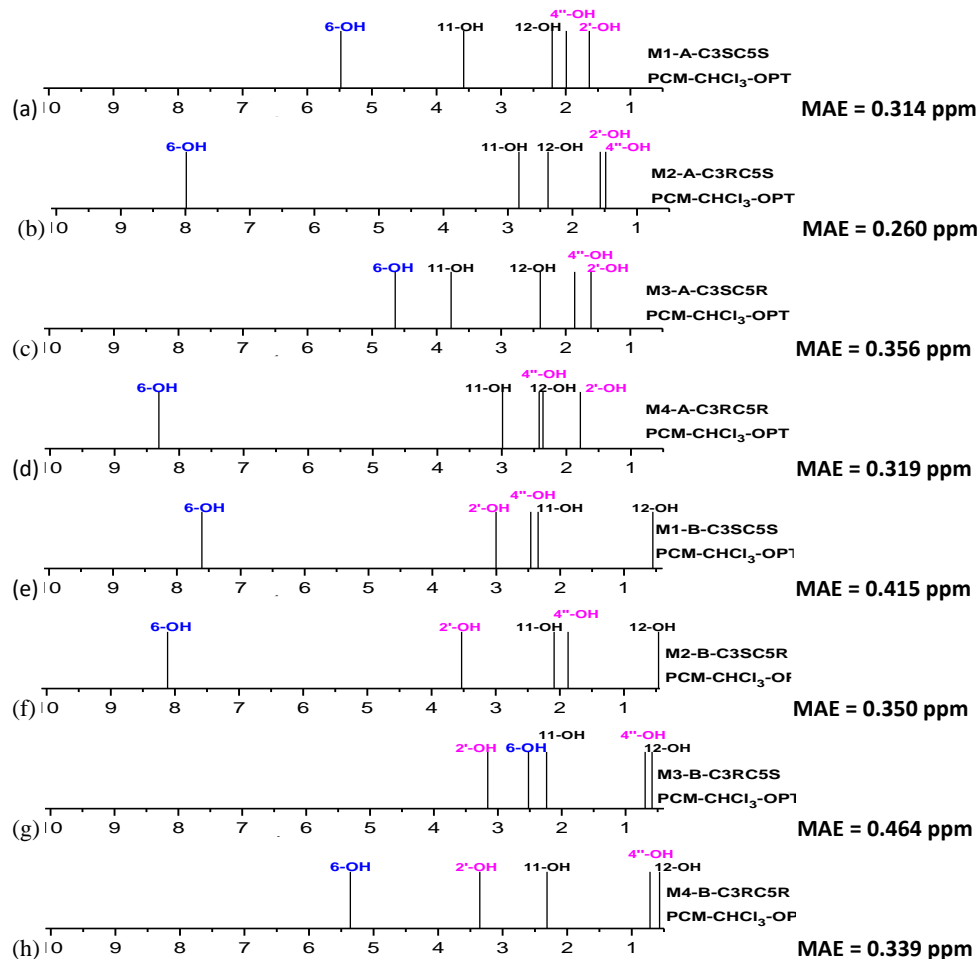

**Figure S3.** B3LYP/6-31G(d,p)-PCM-Chloroform  $^1\text{H}$  NMR spectra for eight Azithromycin DFT fully optimized structures (stereoisomers “A” and “B”).

(a) M1-A-C3S-C5S (b) M2-A-C3R-C5S (c) M3-A-C3S-C5R (d) M4-A-C3R-C5R

(e) M1-B-C3S-C5S (f) M2-B-C3S-C5R (g) M3-B-C3R-C5S (h) M4-B-C3R-C5R

**Table S1.**  $\omega$ B97x-D/6-31G(d, p) (PCM-Chloroform) optimized O-H bond torsion angles ( $^{\circ}$ ) and O-H hydrogen bond distances ( $\text{\AA}$ ) for stereoisomers A and B of azithromycin optimized using as input X-Ray structures (cartesian coordinates). Results for geometries optimized in the vacuum, PCM-Chloroform, and including five explicit solvent molecules ( $5\text{CHCl}_3$ ) are reported.

| Structures                                        | M2-A<br>Vac--OPT        | M2-A<br>PCM--OPT | M2-A<br>PCM-OPT<br>5CHCl <sub>3</sub> | X-Ray Str. | M2-B<br>Vac--OPT        | M2-B<br>PCM--OPT | M2-B<br>PCM-OPT<br>5CHCl <sub>3</sub> | X-Ray Str. |
|---------------------------------------------------|-------------------------|------------------|---------------------------------------|------------|-------------------------|------------------|---------------------------------------|------------|
|                                                   | <b>Stereoisomer "A"</b> |                  |                                       |            | <b>Stereoisomer "B"</b> |                  |                                       |            |
| <b>O-H Dihedral Angle (<math>^{\circ}</math>)</b> |                         |                  |                                       |            |                         |                  |                                       |            |
| $\gamma_1$ [H-O-C2'-C1']                          | -51.9                   | -53.2            | -51.3                                 | 179.9      | -146.7                  | -149.3           | -151.7                                | -61.1      |
| $\gamma_2$ [H-O-C4''-C3'']                        | -38.6                   | -43.4            | -46.0                                 | -123.6     | 38.6                    | 36.5             | 35.1                                  | 60.3       |
| $\gamma_3$ [H-O-C6-C5]                            | 137.0                   | 124.2            | 111.8                                 | -58.4      | -132.6                  | -133.9           | -126.6                                | -61.0      |
| $\gamma_4$ [H-O-C11-C10]                          | 141.6                   | 146.2            | 144.8                                 | 179.8      | 87.0                    | 86.0             | 88.1                                  | 65.0       |
| $\gamma_5$ [H-O-C12-C11]                          | 37.2                    | 36.8             | 36.9                                  | 55.7       | 173.0                   | 167.1            | -169.7                                | 180.0      |
| <b>H-bond Distance (<math>\text{\AA}</math>)</b>  |                         |                  |                                       |            |                         |                  |                                       |            |
| C2'-OH...O                                        | 2.37                    | 2.33             | 2.33                                  | NO H-Bond  | 2.38                    |                  |                                       | NO H-Bond  |
| C2'-OH...N                                        | -                       | -                | -                                     | NO H-Bond  |                         | 2.05             | 2.03                                  | NO H-Bond  |
| C4''-OH...O                                       | 2.09                    | 2.18             | 2.16                                  | NO H-Bond  | 2.10                    | 2.07             | 2.06                                  | NO H-Bond  |
| C6-OH...N                                         | 1.77                    | 1.73             | 1.82                                  | NO H-Bond  | 1.90                    | 1.72             | 1.69                                  | 2.62       |
| C11-OH...O                                        | 2.00                    | 2.03             | 1.88                                  | NO H-Bond  | 1.93                    | 2.01             | 1.99                                  | 2.27       |
| C12-OH...O                                        | 2.11                    | 2.10             | 2.10                                  | 2.21       | 2.11                    | NO H-Bond        | NO H-Bond                             | NO H-Bond  |

**Table S2.** Selected X-Ray torsion angles ( $^{\circ}$ ) for stereoisomers A and B of azithromycin. Sugar rings and 15-membered macrolide units torsion angles are placed separately.

| Structures                                    | Stereoisomer A<br>C3R-C5S      |                     |                   | Stereoisomer B<br>C3S-C5R |                                    |          |           |                     |           |
|-----------------------------------------------|--------------------------------|---------------------|-------------------|---------------------------|------------------------------------|----------|-----------|---------------------|-----------|
|                                               | Ref. [7]<br>Mon-Hyd            | Ref. [39]<br>Di-Hyd | Ref. [41]<br>2007 | Ref. [40]<br>Di-Hyd       | Ref. [8]                           | Ref. [9] | Ref. [36] | Ref. [37]           | Ref. [38] |
|                                               | XR1-A                          | XR2-A               | XR3-A             | XR4-B                     | XR5-B                              | XR6-B    | XR7-B     | XR8-B               | XR9-B     |
|                                               | Pure AZM                       | Pure AZM            | Pure AZM          | Pure AZM                  | AZM interacting with other species |          |           |                     |           |
| <b>Dihedral Angle (<math>^{\circ}</math>)</b> | <b>X-Ray Strs. Sugar rings</b> |                     |                   |                           |                                    |          |           |                     |           |
| $\phi_1$ [C1'-O-C5-C6]                        | -124.5                         | -124.6              | -124.3            | 133.3                     | 130.9                              | 119.4    | 123.2     | 100.1               | 123.4     |
| $\phi_2$ [C1''-O-C3-C4]                       | -154.7                         | -154.2              | -153.0            | 145.2                     | 146.1                              | 144.9    | 147.3     | 146.1               | 142.0     |
| $\phi_{1b}$ [C2'-C1'-O-C5]                    | -162.1                         | -161.7              | -161.3            | 156.3                     | 169.9                              | 168.2    | 166.2     | -152.6 <sup>a</sup> | 164.9     |
| $\phi_{2b}$ [C2''-C1''-O-C3]                  | -160.5                         | -161.3              | -163.5            | 152.5                     | 147.7                              | 153.8    | 155.3     | 154.2               | 149.8     |
| <b>Dihedral Angle (<math>^{\circ}</math>)</b> | <b>15-Membered Macrocycle</b>  |                     |                   |                           |                                    |          |           |                     |           |
| $\phi_1'$ [C4-C5-C6-C7]                       | 71.2                           | 71.1                | 72.3              | -71.9                     | -81.7                              | -73.0    | -74.7     | -69.6               | -70.6     |
| $\phi_3'$ [O-C1-C2-C3]                        | -125.7                         | -126.3              | -126.4            | 121.9                     | 125.8                              | 124.5    | 120.4     | 121.4               | 129.7     |
| $\phi_4'$ [C12-C13-O-C1]                      | -128.1                         | -126.2              | -127.5            | 118.8                     | 120.9                              | 116.9    | 127.7     | 119.4               | 122.0     |
| $\phi_6'$ [C9-N-C10-C11]                      | -146.8                         | -147.5              | -145.3            | 158.5                     | 142.5                              | 142.0    | 144.9     | 156.7               | 132.7     |

<sup>a</sup> This large deviation from the other dihedral angles for enantiomer B causes a short contact between a pair of hydrogen atoms from C6' and C6'' methyl groups (H-H distance 0.72  $\text{\AA}$ ) due to crystal packing effects for structure from Ref. [37]. This is not observed for the other X-Ray structures. Stereoisomer A (free AZM) exhibits larger H-H distances than B (interacting with biological targets).

**Table S3.**  $\omega$ B97x-D/6-31G(d, p) (PCM-5CHCl<sub>3</sub>) optimized torsion angles (°) for stereoisomers A and B of azithromycin. Sugar rings and 15-membered macrolide unit torsion angles are placed separately. O-H H-bond distances (Å) are given. X-Ray data are also given.

| Structures                      | M2-A<br>PCM-OPT-<br>5CHCl <sub>3</sub>            | X-Ray Str-A <sup>a</sup><br>Mono-Hyd-Pure | X-Ray Str-A <sup>b</sup><br>Di-Hyd-Pure | Deviation <sup>c</sup> | M2-B<br>PCM-OPT-<br>5CHCl <sub>3</sub>         | X-Ray Str-B <sup>d</sup><br>Di-Hyd-Pure | X-Ray Str-B <sup>e</sup><br>Complexed-<br>Protein | Deviation <sup>f</sup> |
|---------------------------------|---------------------------------------------------|-------------------------------------------|-----------------------------------------|------------------------|------------------------------------------------|-----------------------------------------|---------------------------------------------------|------------------------|
|                                 | <b>Stereoisomer “A”</b>                           |                                           |                                         |                        | <b>Stereoisomer “B”</b>                        |                                         |                                                   |                        |
|                                 | <b>Dihedral Angle (°): Sugar rings</b>            |                                           |                                         |                        |                                                |                                         |                                                   |                        |
| $\varphi_1$ [C1'-O-C5-C6]       | -132.4                                            | -124.5                                    | -124.6                                  | -7.9                   | 124.8                                          | 133.3                                   | 130.9                                             | 8.5                    |
| $\varphi_2$ [C1''-O-C3-C4]      | -143.1                                            | -154.7                                    | -154.2                                  | 11.6                   | 144.3                                          | 145.2                                   | 146.1                                             | 0.9                    |
| $\varphi_3$ [O-C1'-O-C5]        | 76.8                                              | 77.6                                      | 77.7                                    | -0.8                   | -81.2                                          | -84.5                                   | -67.7                                             | -3.3                   |
| $\varphi_4$ [O-C1''-O-C3]       | 77.8                                              | 73.1                                      | 72.2                                    | 4.7                    | -76.2                                          | -82.5                                   | -85.1                                             | -6.3                   |
| $\varphi_{1a}$ [O-C5-C6-C7]     | -46.8                                             | -51.6                                     | -51.7                                   | 4.8                    | 44.3                                           | 52.4                                    | 39.2                                              | 8.1                    |
| $\varphi_{2a}$ [O-C3-C4-C5]     | 58.8                                              | 73.6                                      | 74.9                                    | -14.8                  | -67.1                                          | -59.4                                   | -53.1                                             | 7.7                    |
| $\varphi_{1b}$ [C2'-C1'-O-C5]   | -164.6                                            | -162.1                                    | -161.7                                  | -2.5                   | 158.5                                          | 156.3                                   | 169.9                                             | -2.2                   |
| $\varphi_{2b}$ [C2''-C1''-O-C3] | -155.2                                            | -160.5                                    | -161.3                                  | 5.3                    | 157.5                                          | 152.5                                   | 147.7                                             | -5                     |
|                                 | <b>Dihedral Angle (°): 15-membered macrocycle</b> |                                           |                                         |                        |                                                |                                         |                                                   |                        |
| $\varphi_1'$ [C4-C5-C6-C7]      | 78.6                                              | 71.2                                      | 71.1                                    | 7.4                    | -80.4                                          | -71.9                                   | -81.7                                             | 8.5                    |
| $\varphi_2'$ [C2-C3-C4-C5]      | -178.6                                            | -162.9                                    | -163.2                                  | -15.7                  | 169.8                                          | 177.2                                   | -178.5                                            | 7.4                    |
| $\varphi_3'$ [O-C1-C2-C3]       | -115.2                                            | -125.7                                    | -126.3                                  | 10.5                   | 124.1                                          | 121.9                                   | 125.8                                             | -2.2                   |
| $\varphi_4'$ [C12-C13-O-C1]     | -100.6                                            | -128.1                                    | -126.2                                  | 27.5                   | 99.5                                           | 118.8                                   | 120.9                                             | 19.3                   |
| $\varphi_5'$ [C10-C11-C12-C13]  | -170.5                                            | -156.6                                    | -157.9                                  | -13.9                  | 171.3                                          | 161.4                                   | 158.6                                             | -9.9                   |
| $\varphi_6'$ [C9-N-C10-C11]     | -150.4                                            | -146.8                                    | -147.5                                  | -3.6                   | 145.1                                          | 158.5                                   | 142.5                                             | 13.4                   |
|                                 | <b>Dihedral Angle (°): O-H Groups</b>             |                                           |                                         |                        |                                                |                                         |                                                   |                        |
| $\gamma_1'$ [H-O-C2'-C1']       | -51.3                                             | 179.9                                     | -0.1                                    | -128.6                 | 57.5                                           | 84.2                                    | -61.1                                             | 26.7                   |
| $\gamma_2'$ [H-O-C4''-C3'']     | -46.0                                             | -123.6                                    | -124.4                                  | 77.6                   | 37.6                                           | 20.8                                    | 60.3                                              | -16.8                  |
| $\gamma_3'$ [H-O-C6-C5]         | 111.8                                             | -58.4                                     | -59.9                                   | 53.4                   | -123.6                                         | -118.4                                  | -61.0                                             | 5.2                    |
| $\gamma_4'$ [H-O-C11-C10]       | 144.8                                             | 179.8                                     | 0.7                                     | -35                    | -144.6                                         | -109.3                                  | 65.0                                              | 35.3                   |
| $\gamma_5'$ [H-O-C12-C11]       | 36.9                                              | 55.7                                      | 55/0                                    | -18.8                  | -38.1                                          | -47.1                                   | 180.0                                             | -9                     |
|                                 | <b>H-bond Distance (Å): O-H Groups</b>            |                                           |                                         |                        |                                                |                                         |                                                   |                        |
|                                 | <b>M2-A<br/>PCM-OPT-<br/>5CHCl<sub>3</sub></b>    | <b>X-Ray Str-A<br/>Mono-Hyd-<br/>Pure</b> | <b>X-Ray Str-A<br/>Di-Hyd-Pure</b>      | -                      | <b>M2-B<br/>PCM-OPT-<br/>5CHCl<sub>3</sub></b> | <b>X-Ray Str-B<br/>Di-Hyd-Pure</b>      | <b>X-Ray Str-B<br/>Complexed-<br/>Protein</b>     | -                      |
| C2'-OH...O                      | 2.33                                              | 3.56<br>(NO H-Bond)                       | 2.50<br>(NO H-Bond)                     | -                      | 2.43                                           | 2.75<br>(NO H-Bond)                     | NO H-Bond                                         | -                      |
| C4''-OH...O                     | 2.16                                              | 3.03<br>(NO H-Bond)                       | 3.01<br>(NO H-Bond)                     | -                      | 2.09                                           | 2.22                                    | NO H-Bond                                         | -                      |
| C6-OH...N                       | 1.82                                              | 3.29<br>(NO H-Bond)                       | 3.28<br>(NO H-Bond)                     | -                      | 1.76                                           | 1.98                                    | 2.62<br>NO H-Bond                                 | -                      |
| C11-OH...O                      | 1.88                                              | 3.55<br>(NO H-Bond)                       | 2.96<br>(NO H-Bond)                     | -                      | 1.84                                           | 3.39<br>(NO H-Bond)                     | 2.27                                              | -                      |
| C12-OH...O                      | 2.10                                              | 2.21                                      | 2.18                                    | -                      | 2.12                                           | 2.20                                    | NO H-Bond                                         | -                      |

<sup>a</sup> See Ref. [7]

<sup>b</sup> See Ref. [41]

<sup>c</sup> Deviation with respect to X-Ray data from Ref. [7]

<sup>d</sup> See Ref. [40]

<sup>e</sup> See Ref. [8]

<sup>f</sup> Deviation with respect to X-Ray data from Ref. [35]



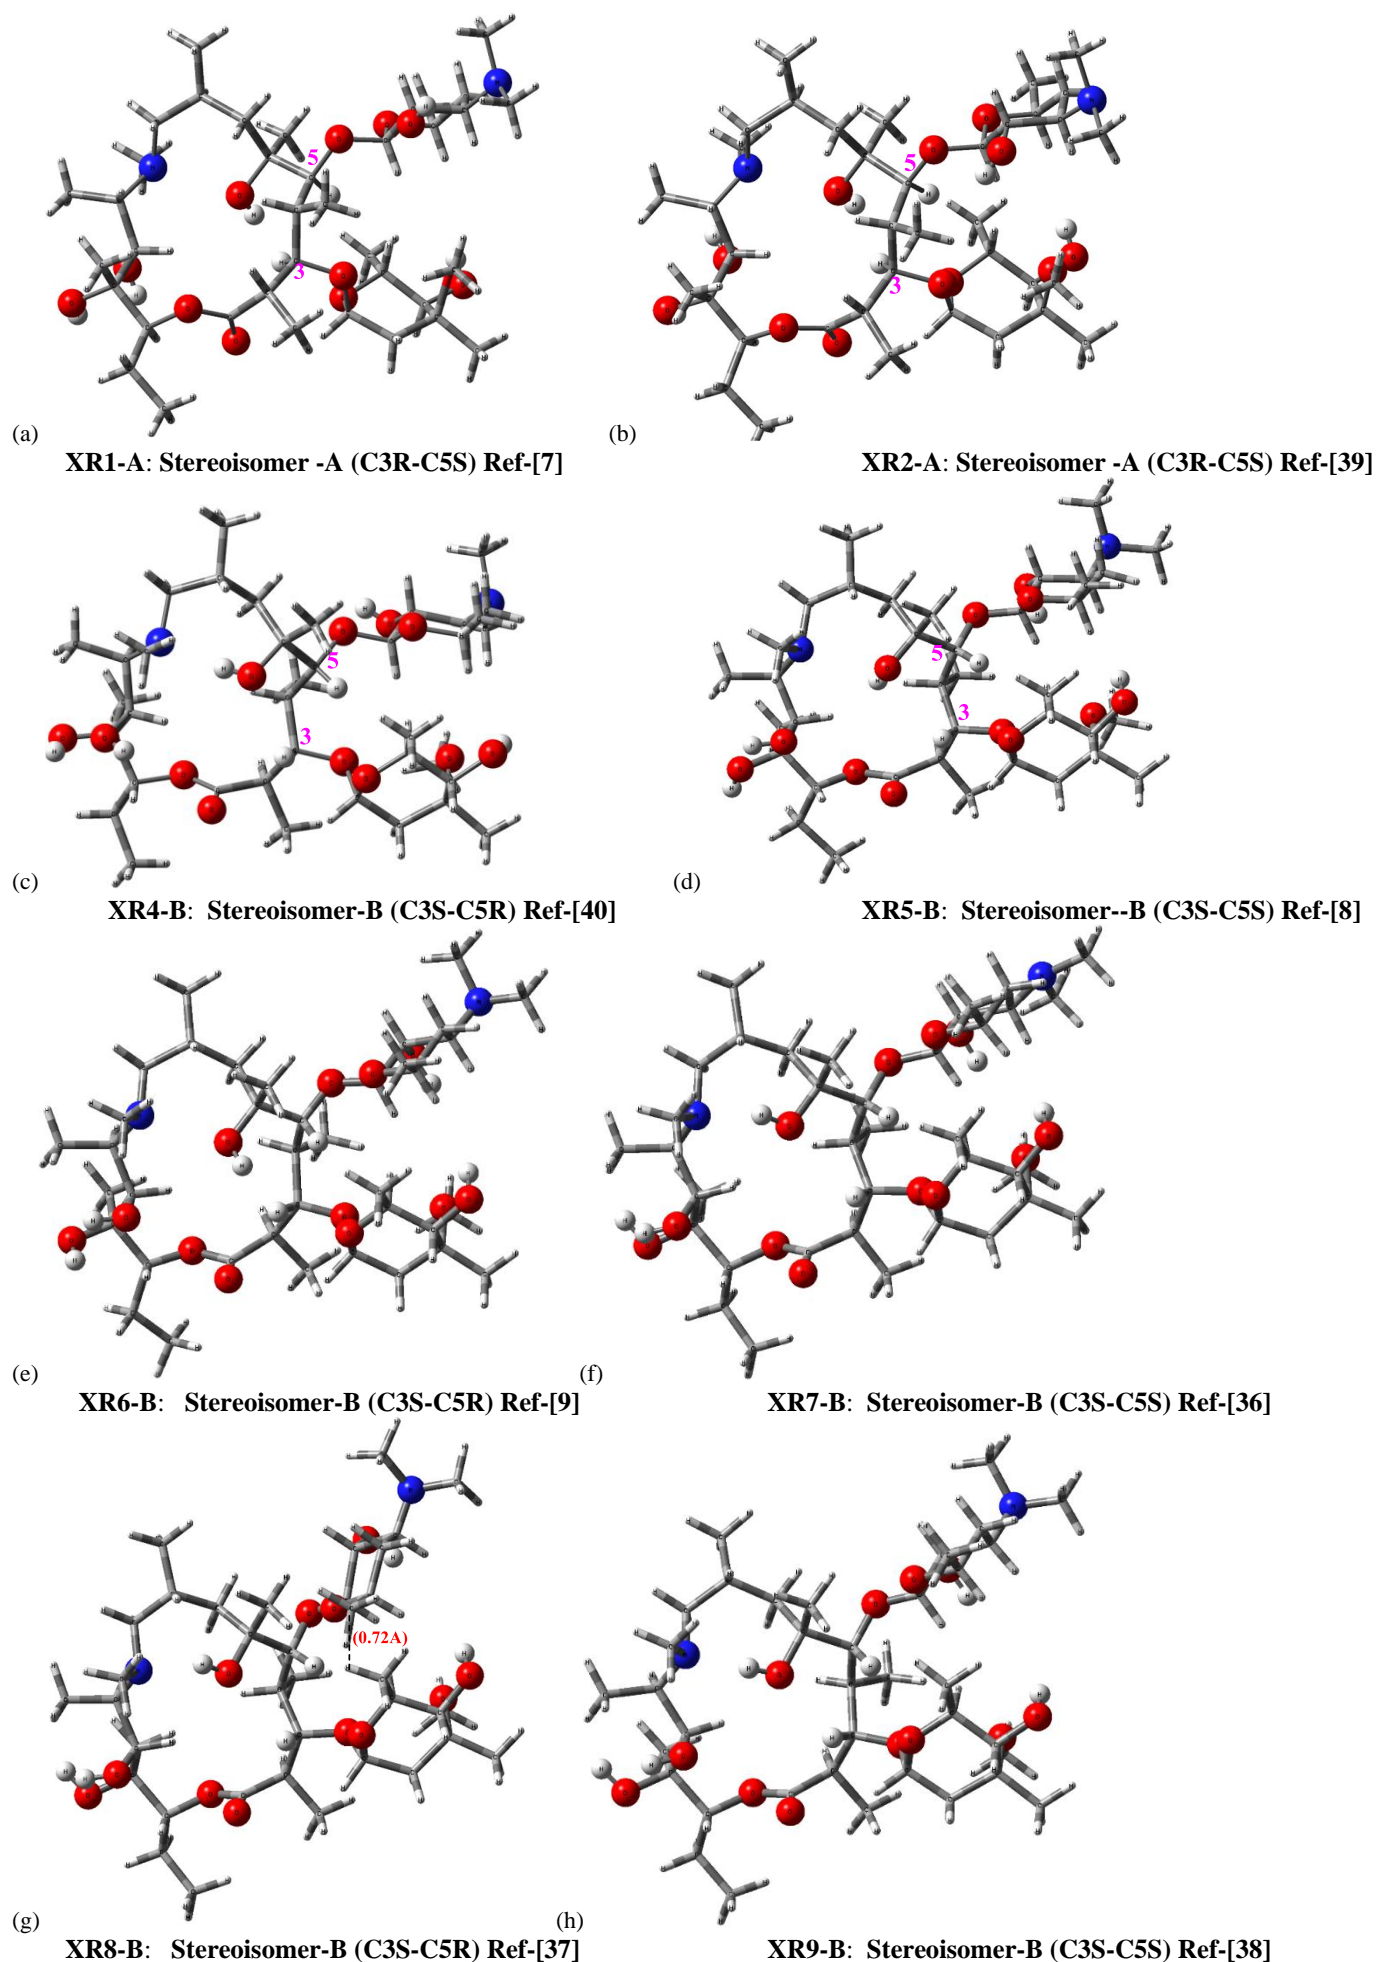

**Figure S4.** Azithromycin X-Ray structures for stereoisomer A (a,b) and B (c-h) B. Crystallographic data can be found in the references indicated in brackets. There is a short contact between a pair of hydrogen atoms from C6' and C6'' methyl groups (H-H distance 0.72 Å) for structure XR7-B due to crystal packing

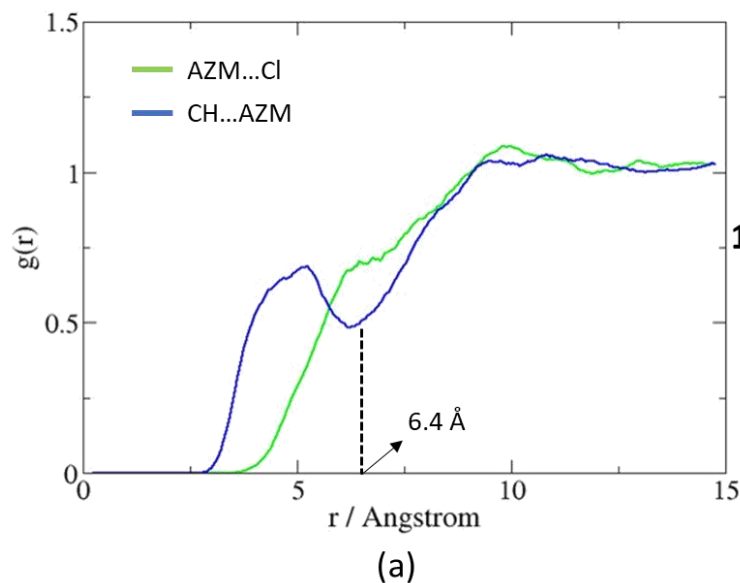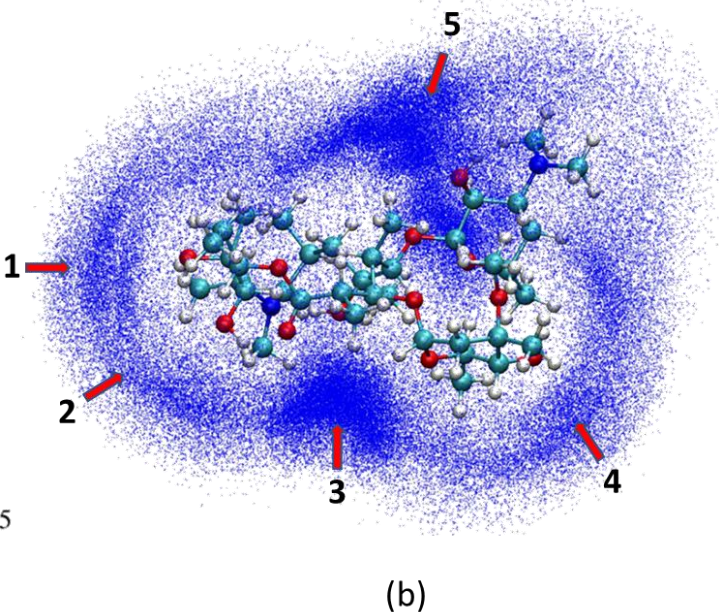

**Figure S5.** (a) Radial distribution function –  $g(r)$  – between AZM (solute) and  $\text{CHCl}_3$  (solvent). The geometric center was used for the solute and H (blue line) or Cl (green line) for  $\text{CHCl}_3$ . (b) Spatial density map representing the overlap of 5000 frames with one solute and 5  $\text{CHCl}_3$  molecules each. The numbers indicate the most probable regions of each solvent molecule. Only the  $\text{CH}\dots\text{AZM}$  curve showed a peak centered at  $\sim 5 \text{ \AA}$ , which is due to the fact that  $\text{CHCl}_3$  acts as H-donor. The integral of the first peak up to  $6.4 \text{ \AA}$  gave 4 - 5  $\text{CHCl}_3$  molecules on average, which might be assigned as a ‘micro solvation-shell’. The second solvation shell extends up to  $10 \text{ \AA}$  and includes 24 solvent molecules. It is notable that the density of molecules is localized in some specific regions, close to the O atoms, which might be used as reference to include explicit solvent molecules.



## Experimental Procedure

A sample of solid azithromycin was purchased and later extracted from compounding pharmacy pill. Thin-layer chromatography (TLC) was performed on TLC plates (silica gel 60 F254) and visualized by an ethanolic solution of sulfuric acid (20%), under heating, in order to confirm its purity. The  $^1\text{H}$  NMR was measured on a Bruker Avance III HD magnetic resonance spectrometer and was recorded at 500 MHz and  $^{13}\text{C}$  were recorded at 125 MHz. Chemical shifts were reported as  $\delta$  (parts per million - ppm) relative to the signals of  $\text{CDCl}_3$  at 7.26 ppm (singlet) and 77.0 (triplet) for  $^1\text{H}$  and  $^{13}\text{C}$ , respectively. Tetramethylsilane (TMS) was established as an internal reference. NMR chemical shifts are reported employing the following peak abbreviation pattern: s, singlet; d, doublet; dd, double doublet; t, triplet; tdd, triplet of doublet of doublets; dq, doublet of quartets; dt, doublet or triplet; dqd, a double quartet of doublet; ddd, double double doublet; and m, multiplet.

The  $^1\text{H}$  NMR spectrum was deconvoluted with the aim of identifying the most complex signals, as well as identifying the hydroxyl 6-OH. The methyl groups were identified as (Me) and the hydrogen atoms were identified according to **Scheme 1**.

### Characterization data for Azithromycin

$^1\text{H}$  NMR (500 MHz,  $\text{CDCl}_3$ )  $\delta$ : 7.29 (s, 1H, 6-OH)\*, 5.18 (d,  $J = 4.7$  Hz, 1H, H-1''), 4.99 (s, 1H, 11-OH), 4.72 (dd,  $J = 9.8, 2.4$  Hz, 1H, H-13), 4.46 (d,  $J = 7.3$  Hz, 1H, H-1'), 4.28 (dd,  $J = 3.5, 1.9$  Hz, 1H, H-3)\*, 4.11 (dq,  $J = 11.9, 6.0$  Hz, 1H, H-5''), 3.71 (s, 1H, H-5), 3.67 (d,  $J = 7.3$  Hz, 1H, H-11), 3.54 (tdd,  $J = 13.0, 6.5, 2.1$  Hz, 1H, H-5'), 3.36 (s, 3H Me-8''), 3.27 (dd,  $J = 10.0, 7.4$  Hz, 1H, H-2'), 3.06 (d,  $J = 8.0$  Hz, 1H, H-4'')\*, 2.99 (s, 1H, 12-OH), 2.73 (m, 1H, H-2)\*, 2.73 (m, 1H, H-10)\*, 2.56 (d,  $J = 10.70$  Hz, 1H, H-9a), 2.50 (m, 1H, H-3')\*, 2.38 (d,  $J = 15.3$  Hz, 1H, H-2''a), 2.34 (s, 3H, Me-20), 2.33 (s, 6H, Me-7', Me-8'), 2.20 (s, 1H, 2'-OH)\*, 2.12 – 2.01 (m, 3H, H-8, H-9, 4''-OH), 1.98 (qd, 1H,  $J = 7.5, 1.4$  Hz, H-4) 1.92 (dqd,  $J = 14.8, 7.3, 2.3$  Hz, 1H, H-14a)\*, 1.81 (d,  $J = 14.6$  Hz, 1H, H-7a), 1.70 (d,  $J = 11.9$  Hz, 1H, H-4'a), 1.61 (dd,  $J = 15.2, 5.0$  Hz, 1H, H-2''b), 1.48 (ddq,  $J = 14.2, 9.6, 7.2$  Hz, 1H, H-14b), 1.37 – 1.30 (m, 7H, Me-18, Me-6'', H-7), 1.29 (d,  $J = 6.4$  Hz, 1H, H-4'b), 1.27 (s, 3H, Me-7''), 1.25 (d,  $J = 6.1$  Hz, 3H, Me-6'), 1.21 (d,  $J = 7.4$  Hz, 3H, Me-16), 1.14 – 1.10 (m, 6H, Me-21, Me-22), 1.06 (d,  $J = 7.5$  Hz, 3H, Me-17), 0.93 (d,  $J = 6.2$  Hz, 3H, Me-19), 0.91 (t,  $J = 7.3$  Hz, 3H, Me-15).  $^{13}\text{C}$  NMR (125 MHz,  $\text{CDCl}_3$ )  $\delta$ : 178.78, 102.99, 94.54, 83.46, 78.14, 77.47, 77.44, 74.29, 73.8, 73.67, 72.99, 70.87, 70.08, 68.71, 65.63, 65.48, 62.37, 49.47, 45.29, 42.35, 42.11, 40.34, 35.8, 34.77, 28.82, 27.51, 26.79, 21.67, 21.34, 21.28, 21.20, 18.22, 16.18, 14.82, 11.27, 9.10, 7.33.

\* Signals of deconvoluted spectrum

**Table S4:** Identification and comparison of experimental data with literature data<sup>1</sup>

|        | Ref B | A2   | J (A2) / Hz    | Multiplicity | $\Delta\delta$ |
|--------|-------|------|----------------|--------------|----------------|
| 1'     | 4.47  | 4.46 | 7.30           | d            | -0.01          |
| 2'     | 3.23  | 3.27 | 10.0, 7.4      | d            | 0.04           |
| 3'     | 2.48  | 2.50 | -              | m            | 0.02           |
| 4'a    | 1.69  | 1.70 | 11.9           | d            | 0.01           |
| 4'b    | 1.27  | 1.29 | 6.4            | d            | 0.02           |
| 5'     | 3.52  | 3.54 | 13.0, 6.5, 2.1 | tdd          | 0.02           |
| 6'     | 1.21  | 1.25 | 6.10           | d            | 0.04           |
| 7'/8'  | 2.30  | 2.33 | -              | s            | 0.03           |
| 1''    | 5.13  | 5.18 | 4.70           | d            | 0.05           |
| 2''a   | 2.39  | 2.38 | 15.3           | d            | -0.01          |
| 2''b   | 1.59  | 1.61 | 15.2, 5.0      | dd           | 0.02           |
| 4''    | 3.07  | 3.06 | 8.0            | d            | -0.01          |
| 5''    | 4.12  | 4.11 | 11.9, 6.0      | dq           | -0.01          |
| 6''    | 1.34  | 1.35 | 6.40           | d            | 0.01           |
| 7''    | 1.27  | 1.27 | -              | s            | 0              |
| 8''    | 3.34  | 3.36 | -              | s            | 0.02           |
| 2      | 2.76  | 2.73 | -              | m            | -0.03          |
| 3      | 4.30  | 4.28 | 3.5, 1.9       | dd           | -0.02          |
| 4      | 1.99  | 1.98 | 7.5, 1.4       | qd           | -0.01          |
| 5      | 3.65  | 3.71 | -              | s            | 0.06           |
| 7a     | 1.80  | 1.81 | 14.60          | d            | 0.01           |
| 7b     | 1.33  | 1.35 | -              | m            | 0.02           |
| 8      | 2.01  | 2.05 | -              | m            | 0.04           |
| 9a     | 2.55  | 2.56 | 10.70          | d            | 0.01           |
| 9b     | 2.09  | 2.05 | -              | m            | -0.04          |
| 10     | 2.70  | 2.73 | m              | -            | 0.03           |
| 11     | 3.70  | 3.67 | 7.30           | d            | -0.03          |
| 13     | 4.68  | 4.72 | 9.8, 2.4       | dd           | 0.04           |
| 14a    | 1.89  | 1.92 | 14.8, 7.3, 2.3 | dqd          | 0.03           |
| 14b    | 1.52  | 1.48 | 14.6, 9.6, 7.3 | ddq          | -0.04          |
| 15     | 0.89  | 0.91 | 7.30           | t            | 0.02           |
| 16     | 1.19  | 1.21 | 7.40           | d            | 0.02           |
| 17     | 1.05  | 1.06 | 7.50           | d            | 0.01           |
| 18     | 1.32  | 1.35 | -              | m            | 0.03           |
| 19     | 0.92  | 0.93 | 6.20           | d            | 0.01           |
| 20     | 2.32  | 2.34 | -              | s            | 0.02           |
| 21     | 1.08  | 1.11 | -              | m            | 0.03           |
| 22     | 1.09  | 1.11 | -              | m            | 0.02           |
| 2'-OH  | 2.60  | 2.20 | -              | s            | -0.4           |
| 4''-OH | 2.10  | 2.04 | -              | s            | -0.06          |
| 6-OH   | 9.40  | 7.29 | -              | s            | -2.11          |
| 11-OH  | 5.20  | 4.99 | -              | s            | -0.21          |
| 12-OH  | 3.20  | 2.99 | -              | s            | -0.21          |

# $^1\text{H}$ , $^{13}\text{C}$ NMR, COSY and NOESY

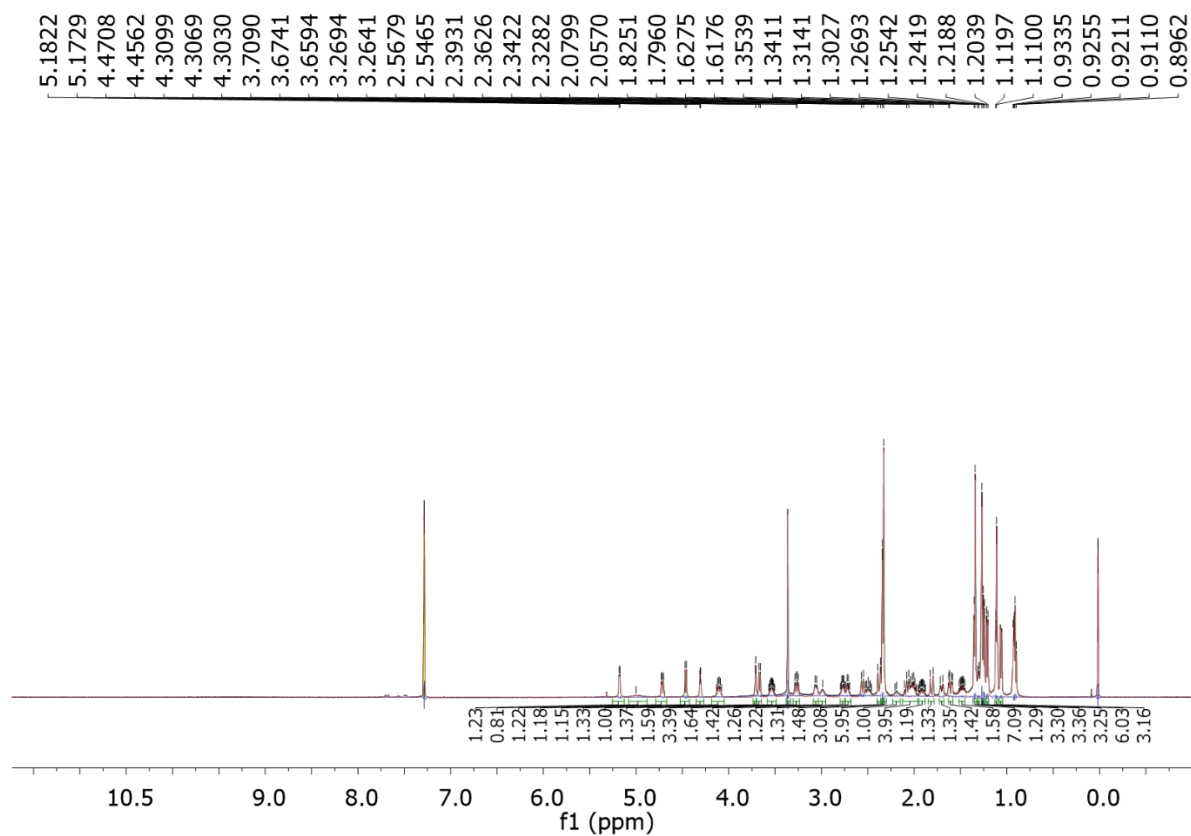

Figure S6.  $^1\text{H}$  NMR spectrum of Azithromycin (500 MHz,  $\text{CDCl}_3$ ).

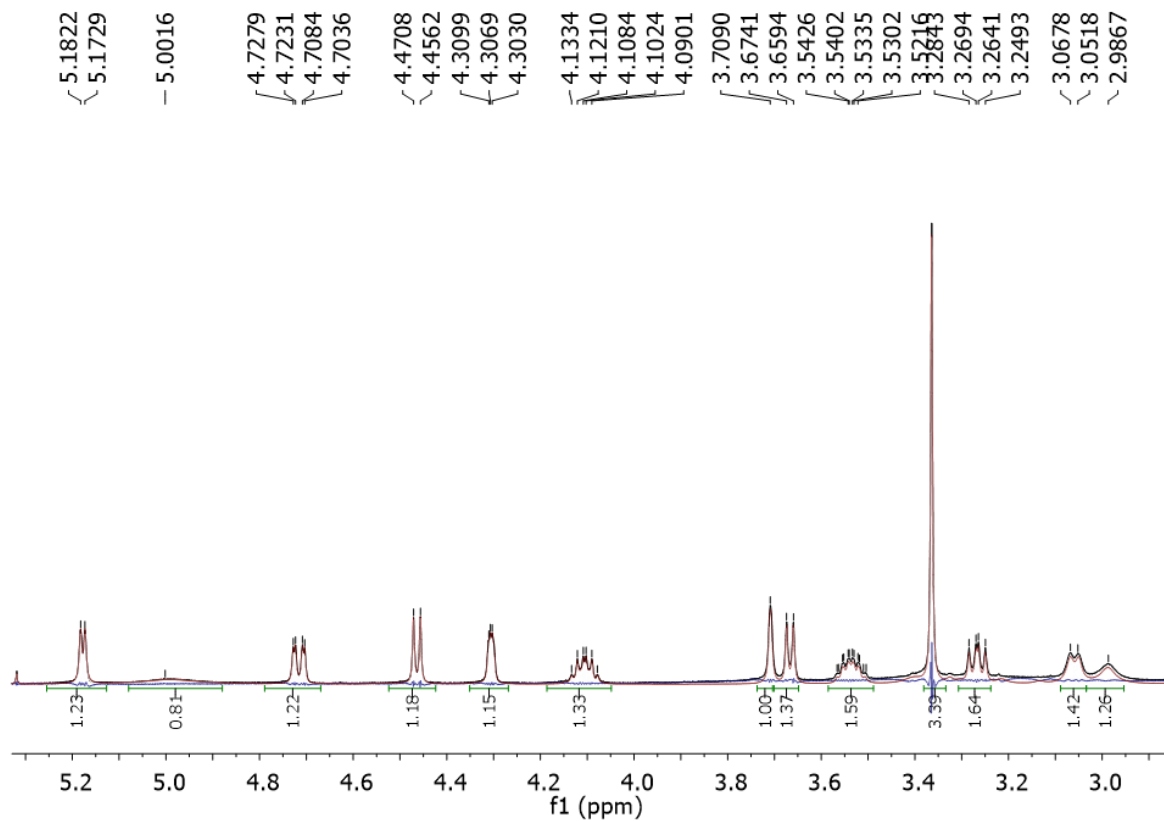

Figure S7. Expanded  $^1\text{H}$  NMR spectrum of Azithromycin ranging from 5.2 to 3.0 ppm

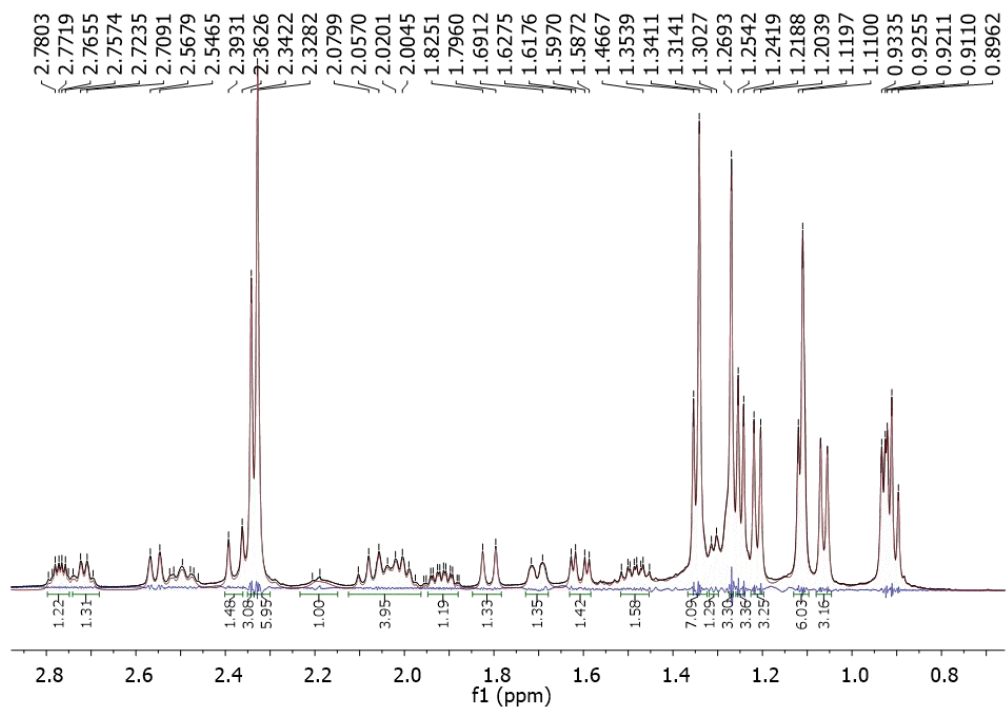

**Figure S8.** Expanded  $^1\text{H}$  NMR spectrum of **Azithromycin** ranging from 3.0 to 0.8 ppm

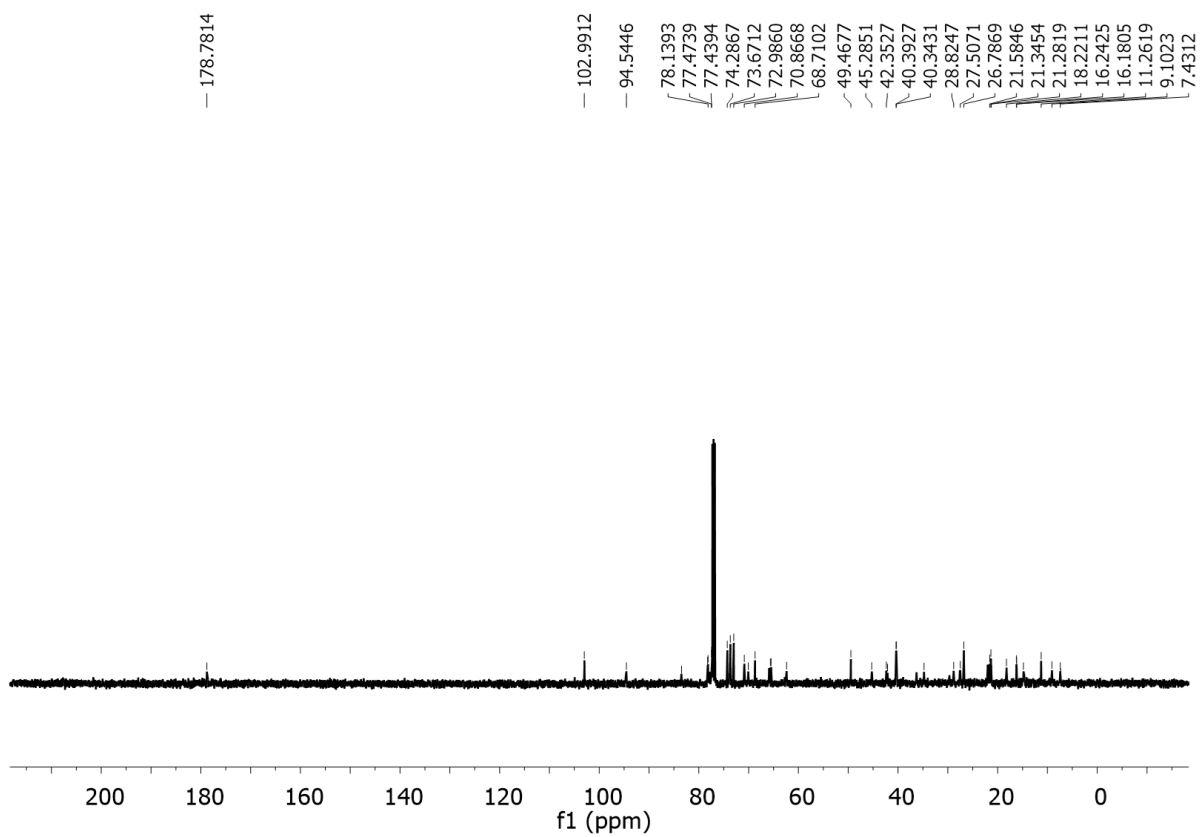

**Figure S9.**  $^{13}\text{C}$  NMR spectrum of **Azithromycin** (125 MHz,  $\text{CDCl}_3$ )

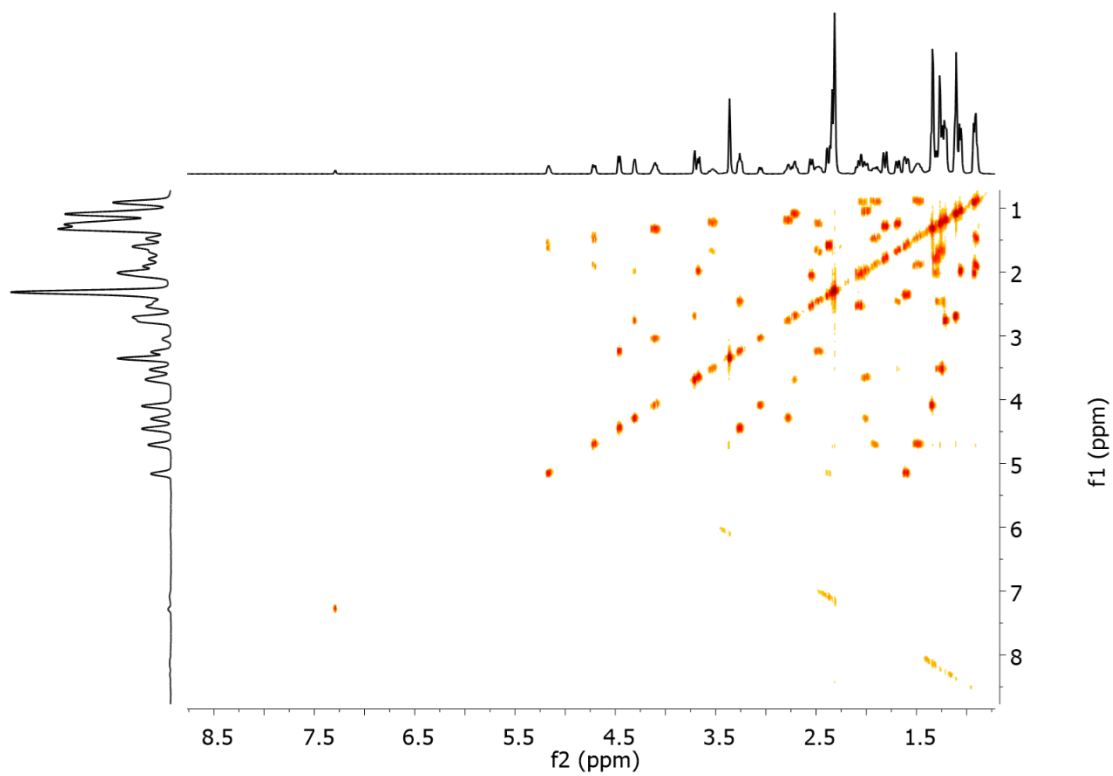

**Figure S10.** COSY contour map of Azithromycin.

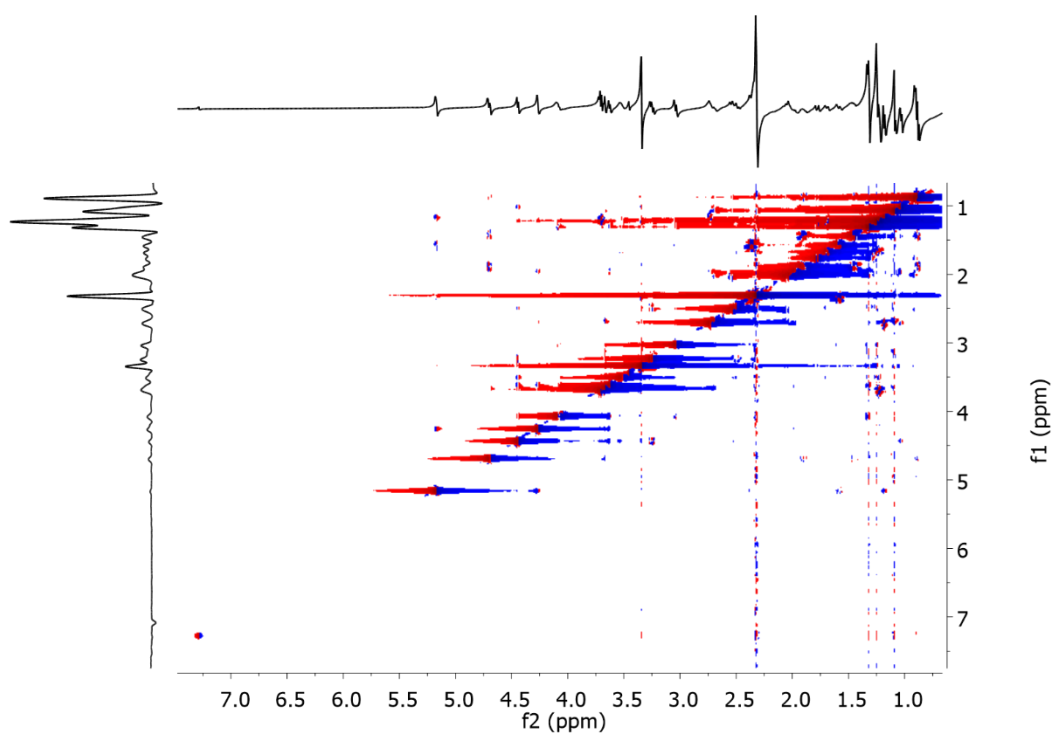

**Figure S11.** NOESY contour map of Azithromycin.

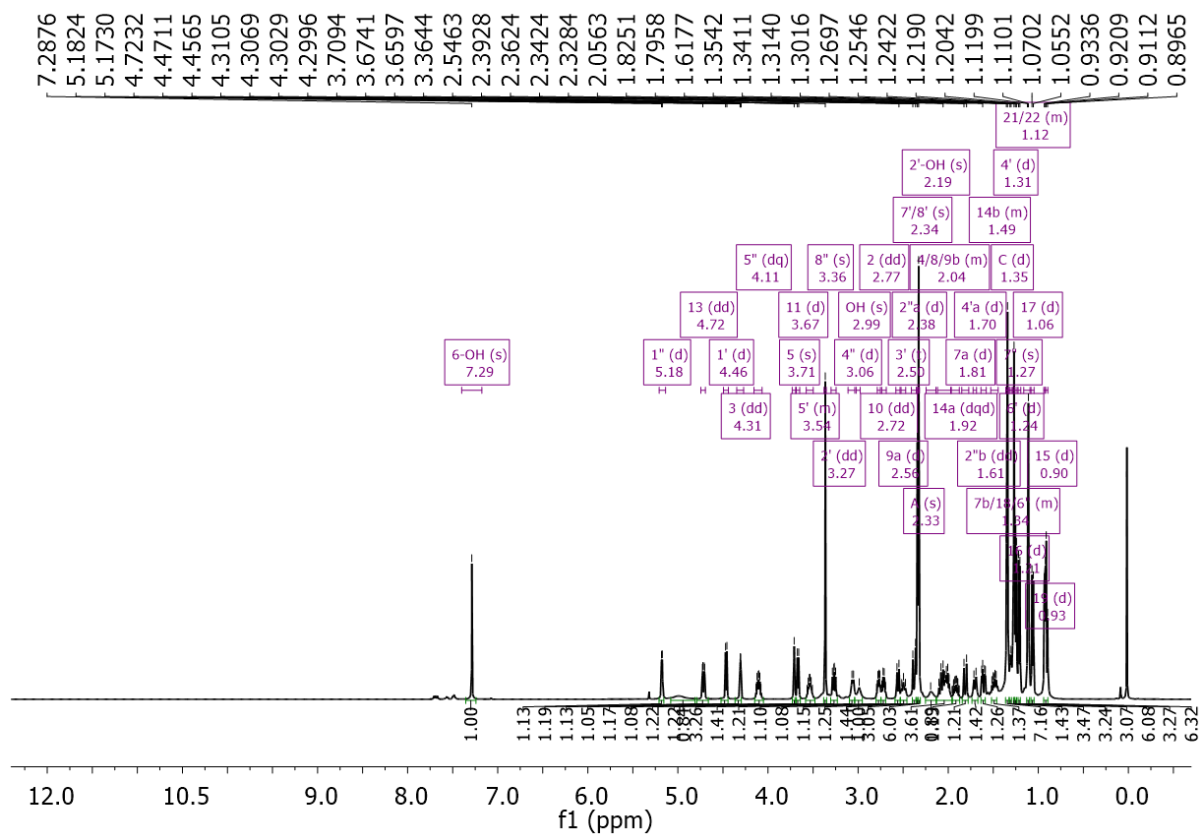

**Figure S12.** Deconvoluted  $^1\text{H}$  NMR spectrum of Azithromycin (500 MHz,  $\text{CDCl}_3$ ).
